# Supplementary material for: Immune response in ofatumumab treated multiple sclerosis patients after SARS-CoV-2 vaccination
Source: PubMed Central journal article supplement (PMC9471319; doi:10.3389/fimmu.2022.980526), 2022-08-31
Supplement: DataSheet_1.pdf [file DataSheet_1.pdf]

## SUPPLEMENT

### **Immune Response in Ofatumumab treated Multiple Sclerosis Patients after SARS-CoV-2 Vaccination**

Simon Faissner<sup>1</sup>, Neele Heitmann<sup>1</sup>, Carlos Plaza-Sirvent<sup>2</sup>, Paulina Trendelenburg<sup>1</sup>, Ulas Ceylan<sup>1</sup>, Jeremias Motte<sup>1</sup>, Clara Bessen<sup>2</sup>, Doris Urlaub<sup>3</sup>, Carsten Watzl<sup>3</sup>, Oliver Overheu<sup>4</sup>, Anke Reinacher-Schick<sup>4</sup>, Kerstin Hellwig<sup>1</sup>, Stephanie Pfaender<sup>5</sup>, Ingo Schmitz<sup>2</sup>, Ralf Gold<sup>1</sup>

<sup>1</sup> Department of Neurology, Ruhr-University Bochum, St. Josef-Hospital, Bochum, Germany,

<sup>2</sup> Department of Molecular Immunology, Ruhr-University Bochum, Bochum, Germany

<sup>3</sup> Department for Immunology, Leibniz Research Centre for Working Environment and Human Factors (IfADo) at TU Dortmund, Dortmund, Germany

<sup>4</sup> Department of Hematology, Oncology and Palliative Care, St. Josef Hospital, Ruhr-University Bochum, Bochum, Germany

<sup>5</sup> Department of Molecular and Medical Virology, Ruhr-University Bochum, Bochum, Germany

**Supplementary Table 1: Antibodies used for immunostaining prior to flow cytometry.** The top table presents the antibodies used for lymphocyte phenotyping. The table at the bottom includes the antibodies used after peripheral blood mononuclear cells restimulation.

| <b>antibody</b>    | <b>conjugate/dye</b>          | <b>dilution</b> | <b>clone</b> | <b>RRID</b> |
|--------------------|-------------------------------|-----------------|--------------|-------------|
| viability          | blue fluorescent reactive dye | 1/1000          |              |             |
| anti-CD3           | BV510                         | 1/100           | UCHT1        | AB_2563468  |
| anti-CD4           | PerCP-Cy5.5                   | 1/500           | OKT4         | AB_1186124  |
| anti-CD8a          | APC/Fire750                   | 1/500           | RPA-T8       | AB_2572095  |
| anti-CD19          | Alexa Fluor 700               | 1/500           | HIB19        | AB_493751   |
| anti-CD25          | BV421                         | 1/200           | BC96         | AB_10896914 |
| anti-CD27          | BV785                         | 1/100           | O323         | AB_11219185 |
| anti-CD45RA        | PerCP                         | 1/100           | HI100        | AB_2616996  |
| anti-CD95          | BV650                         | 1/100           | DX2          | AB_2629739  |
| anti-CD107a        | BV711                         | 1/200           | H4A3         | AB_2565839  |
| anti-CD127         | BUV737                        | 1/20            | HIL-7R-M21   | AB_2870121  |
| anti-CD185         | AF488                         | 1/100           | J252D4       | AB_2561893  |
| anti-CD197         | APC                           | 1/100           | G043H7       | AB_10915474 |
| anti-CD279         | DE-Dazzle 594                 | 1/20            | EH12.2H7     | AB_2563658  |
| anti-Foxp3         | PE                            | 1/20            | 206D         | AB_492987   |
| anti-Ki-67         | PE-Cy7                        | 1/1000          | Ki-67        | AB_2562871  |
| <b>antibody</b>    | <b>conjugate/dye</b>          | <b>dilution</b> | <b>clone</b> | <b>RRID</b> |
| viability          | blue fluorescent reactive dye | 1/1000          |              |             |
| anti-CD14          | BV421                         | 1/100           | 63D3         | AB_2810580  |
| anti-CD19          | Alexa Fluor 700               | 1/50            | HIB19        | AB_493751   |
| anti-CD3           | BV510                         | 1/100           | UCHT1        | AB_2563468  |
| anti-CD4           | FITC                          | 1/100           | SK3          | AB_1953236  |
| anti-CD8a          | APC/Fire750                   | 1/100           | RPA-T8       | AB_2572095  |
| anti-CD137         | PE-Dazzle                     | 1/50            | 4B4-1        | AB_2566260  |
| anti-CD154         | PE-Cy7                        | 1/50            | 24-31        | AB_2563017  |
| anti-CD137         | PE-Dazzle                     | 1/50            | 4B4-1        | AB_2566260  |
| anti-CD154         | PE-Cy7                        | 1/50            | 24-31        | AB_2563017  |
| anti-IFN- $\gamma$ | PerCP-Cy5.5                   | 1/50            | 4S.B3        | AB_315234   |
| anti-IL-2          | APC                           | 1/50            | MQ1-17H12    | AB_315097   |
| anti-IL-4          | PE                            | 1/50            | MP4-25D2     | AB_2563879  |
| anti-IL-17         | BV786                         | 1/28.5          | BL168        | AB_2566765  |

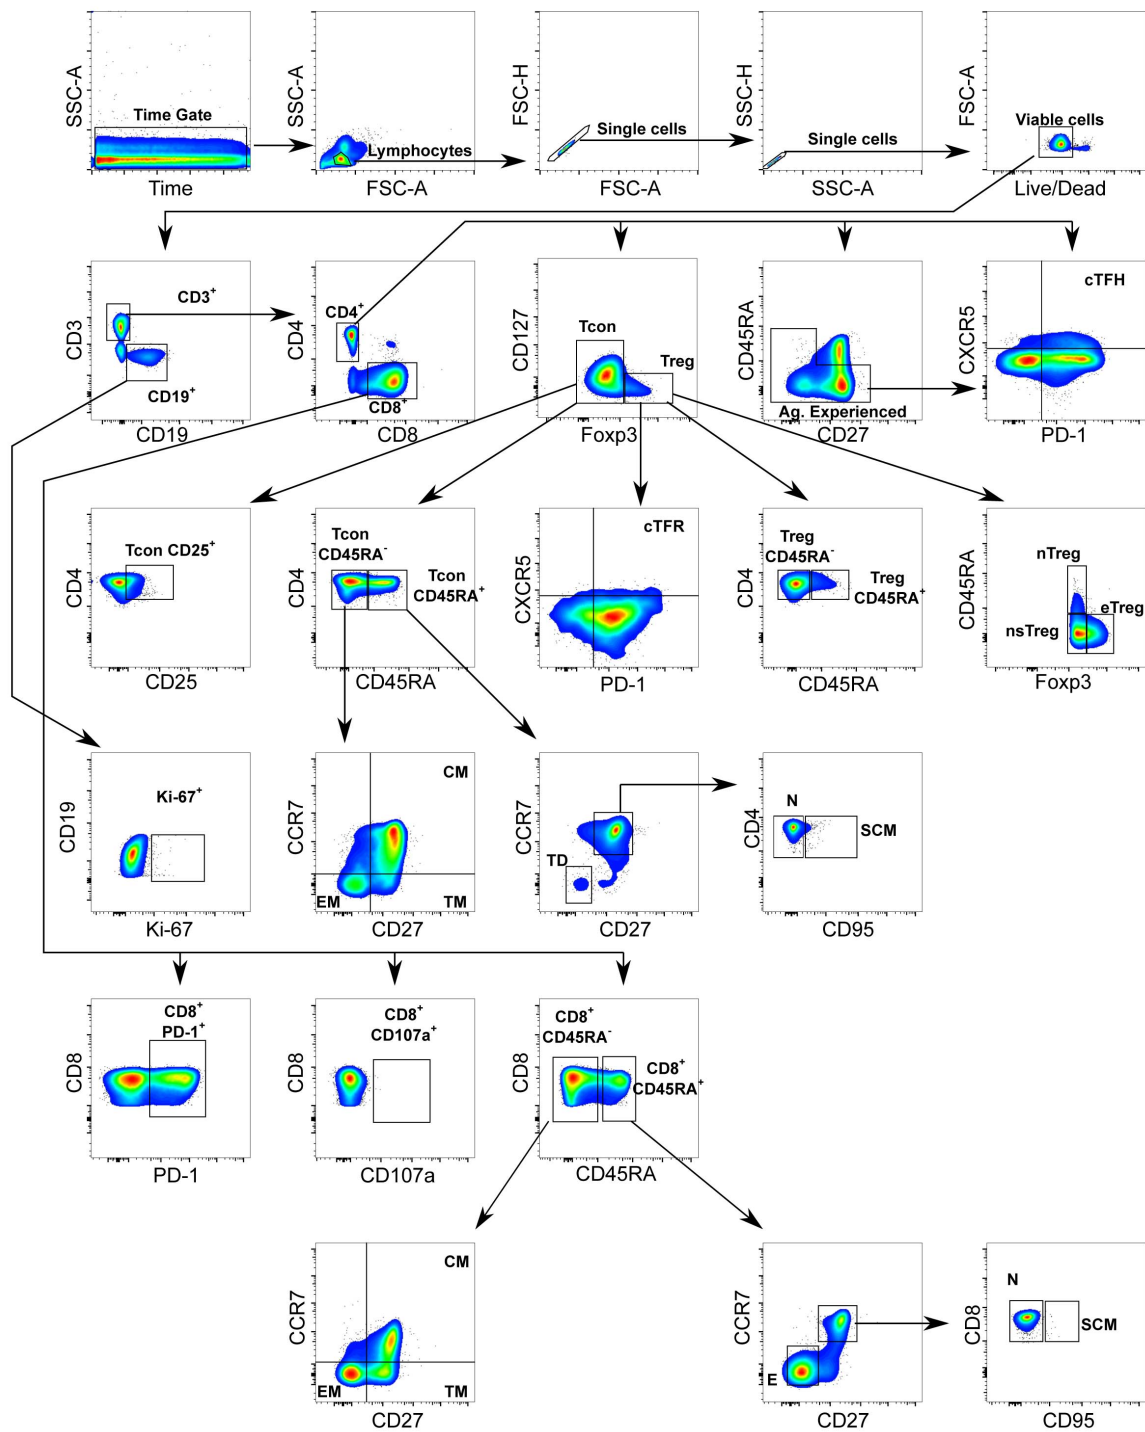

**Supplementary Figure 1: Gating strategy for lymphocyte gating applicable to the flow cytometry results presented in Figure 2 and Supplementary Figures 3-5. The gating strategy was conducted in FlowJo™ on lymphocyte samples measured in a Cytoflex LX (Beckman Coulter).**

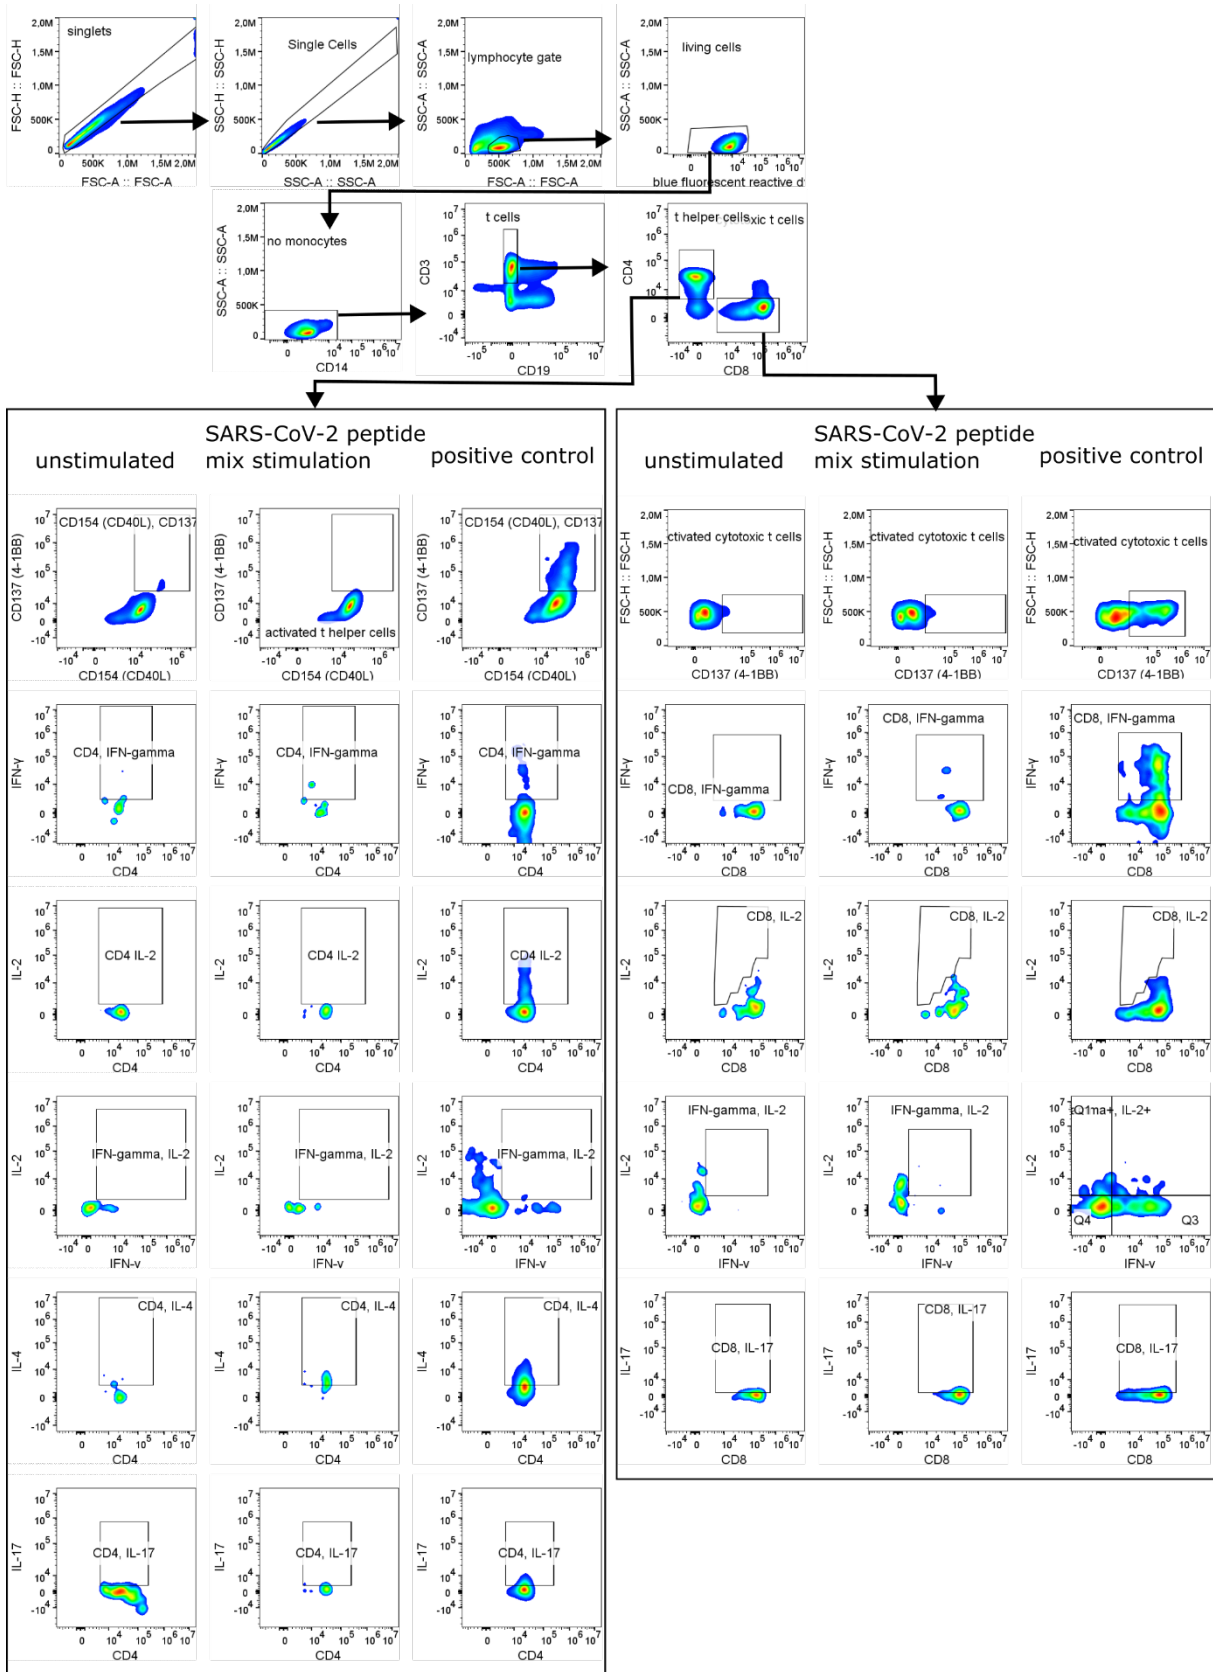

**Supplementary Figure 2: Gating strategy for restimulated peripheral blood mononuclear cells . The gating strategy was used for the flow cytometry data presented in Fig. 3-5 and Fig. S6. Unstimulated controls and CytoStim™ stimulated positive controls were used for setting**

the gates of positive cells in cytokine gating after SARS-CoV-2 peptide mix stimulation. For the comparisons of unstimulated, SARS-CoV-2-peptide mix and positive control, the same participant was used for the presented cytokine example pictures.

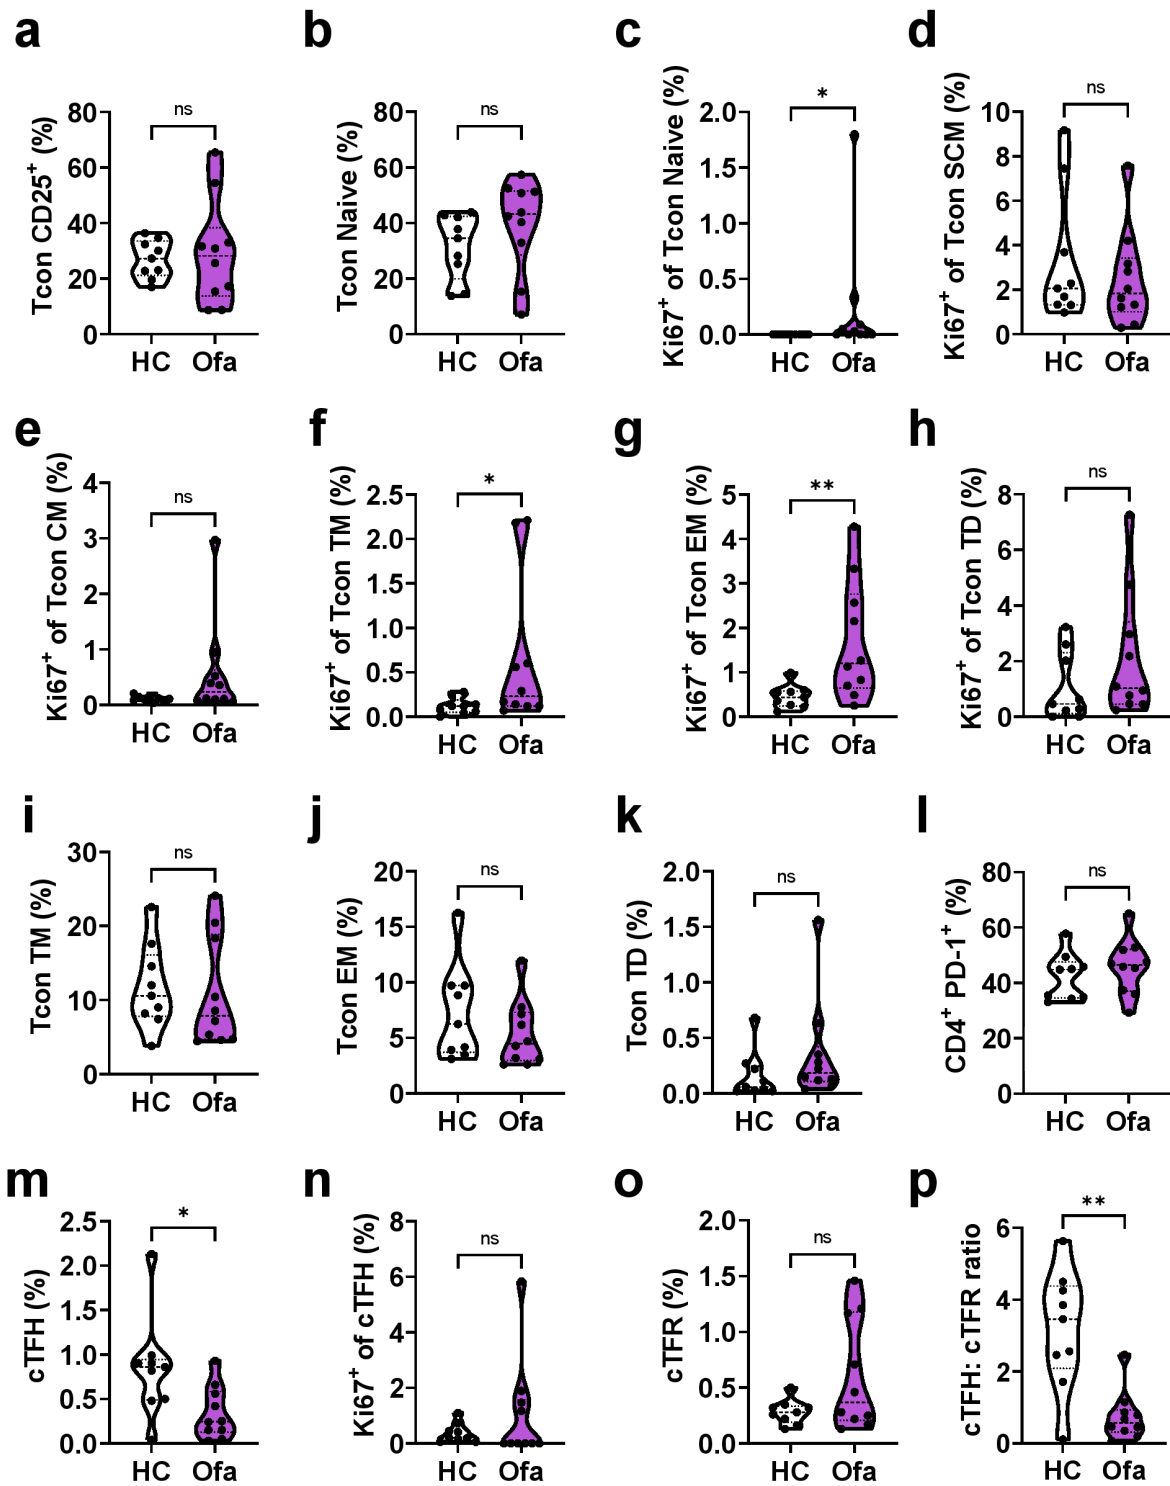

**Supplementary Figure 3: Additional cell frequencies of the T helper cell phenotyping of MS patients under ofatumumab treatment and healthy controls.** Immunophenotyping was conducted in ofatumumab treated multiple sclerosis patients (Ofa) and healthy controls (HC) using multi-color FACS. Subpopulations of CD4<sup>+</sup> T cells: conventional T cells (Tcon), stem cell like memory cells (SCM), central memory cells (CM), transitional memory cells (TM), effector memory cells (EM), terminally differentiated cells (TD), circulating T follicular helper

cells (cTFH), circulating T follicular regulatory cells (cTFR). Data were analyzed with a two-tailed Mann-Whitney test. n=10 Ofa, n=9 HC. \*p<0.05, \*\*p<0.01.

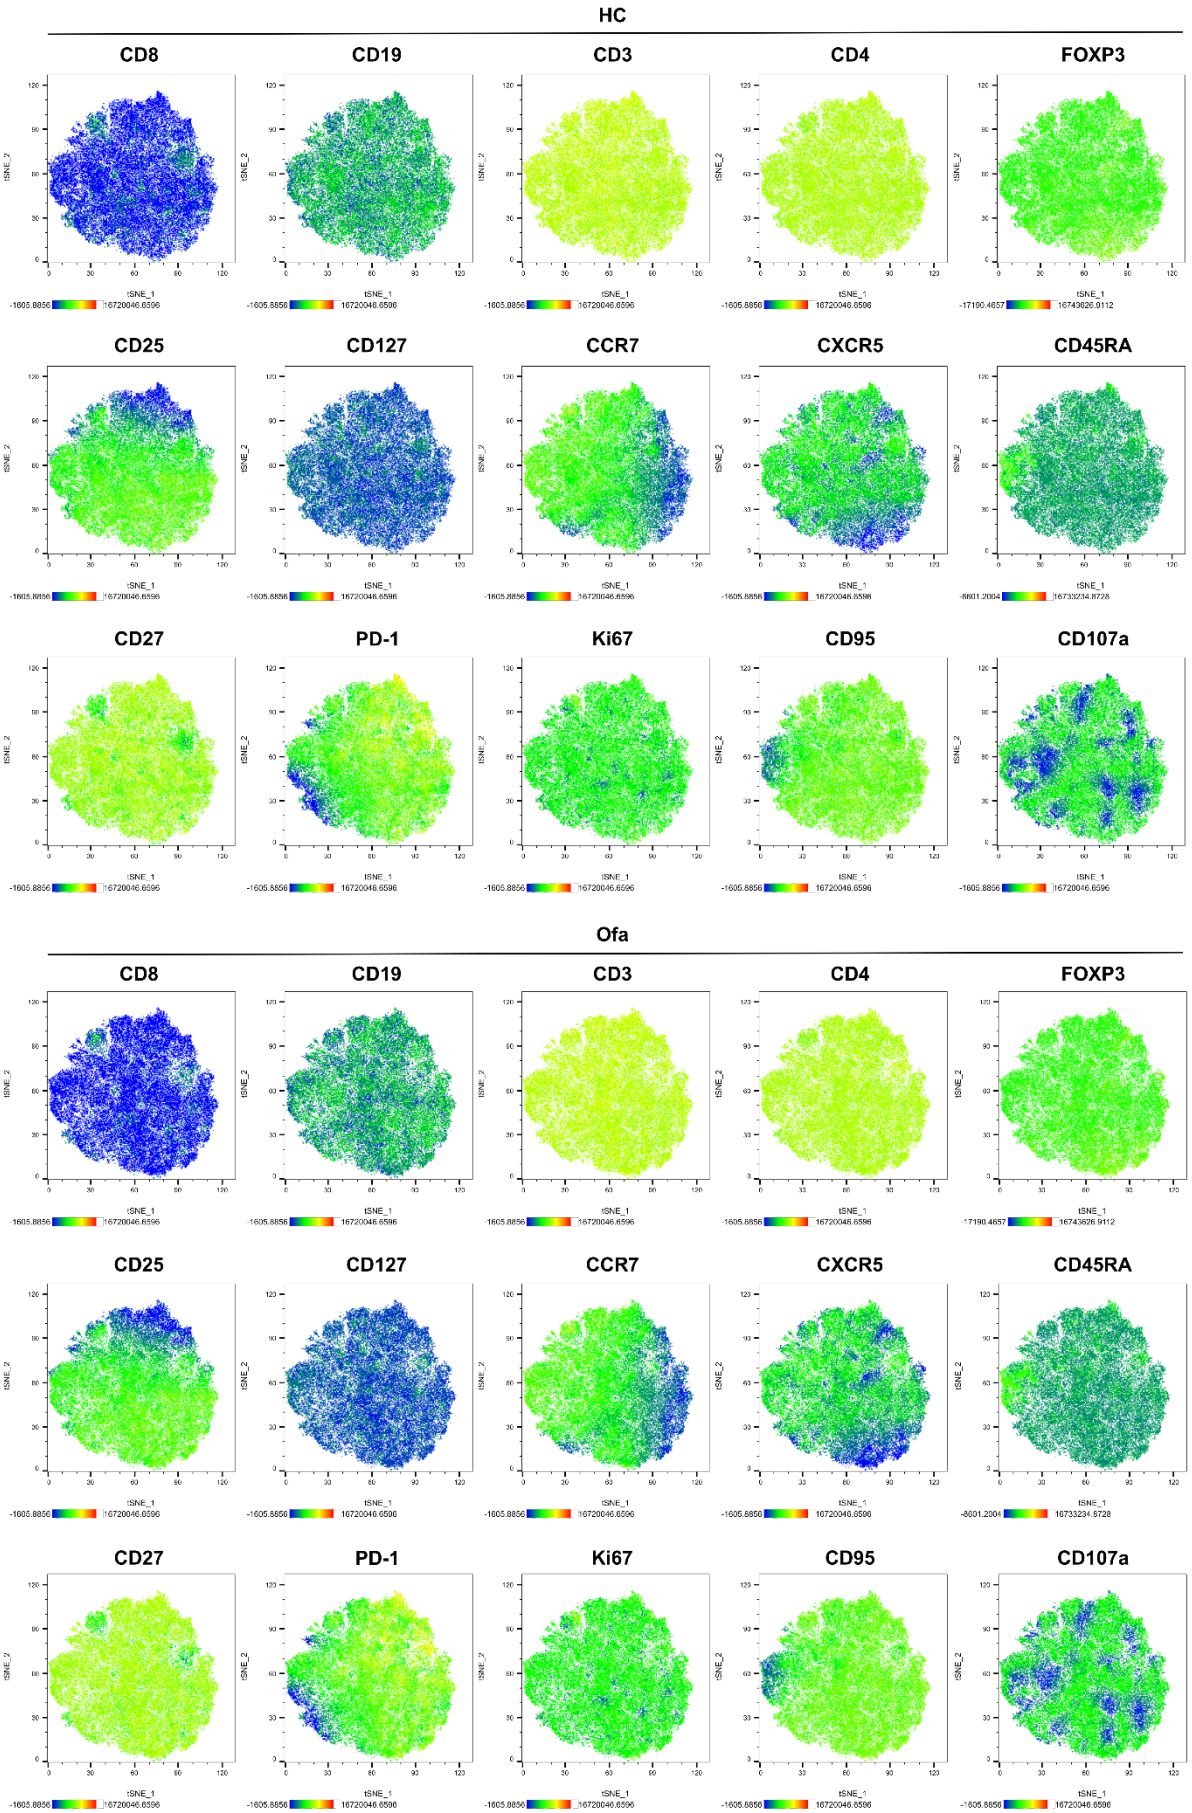

**Supplementary Figure 4: Immunophenotyping of Treg cells. tSNE projection of the**



indicated protein expression in MS patients under ofatumumab treatment and healthy controls.

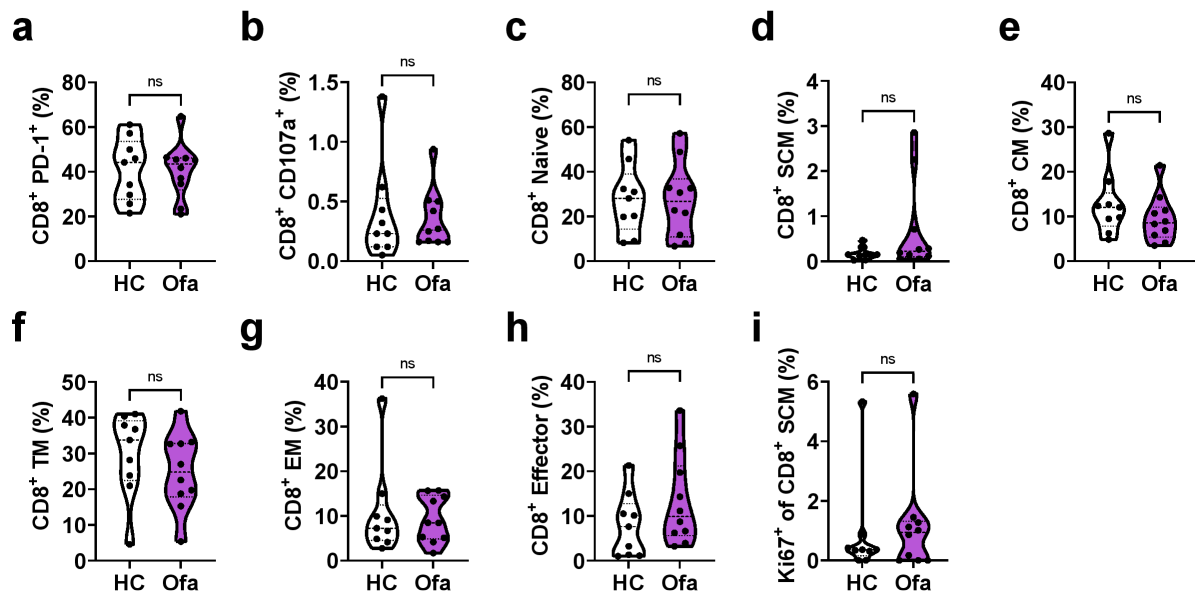

**Supplementary Figure 5: Additional cytotoxic T cell frequencies of the lymphocyte phenotyping of MS patients under ofatumumab treatment and healthy controls.** Immunophenotyping was conducted in Ofa and HC using multi-color FACS. Subpopulations of CD8<sup>+</sup> T cells: stem cell like memory cells (SCM), central memory cells (CM), transitional memory cells (TM), effector memory cells (EM). Data were analyzed with a two-tailed Mann-Whitney test. n=10 Ofa, n=9 HC.

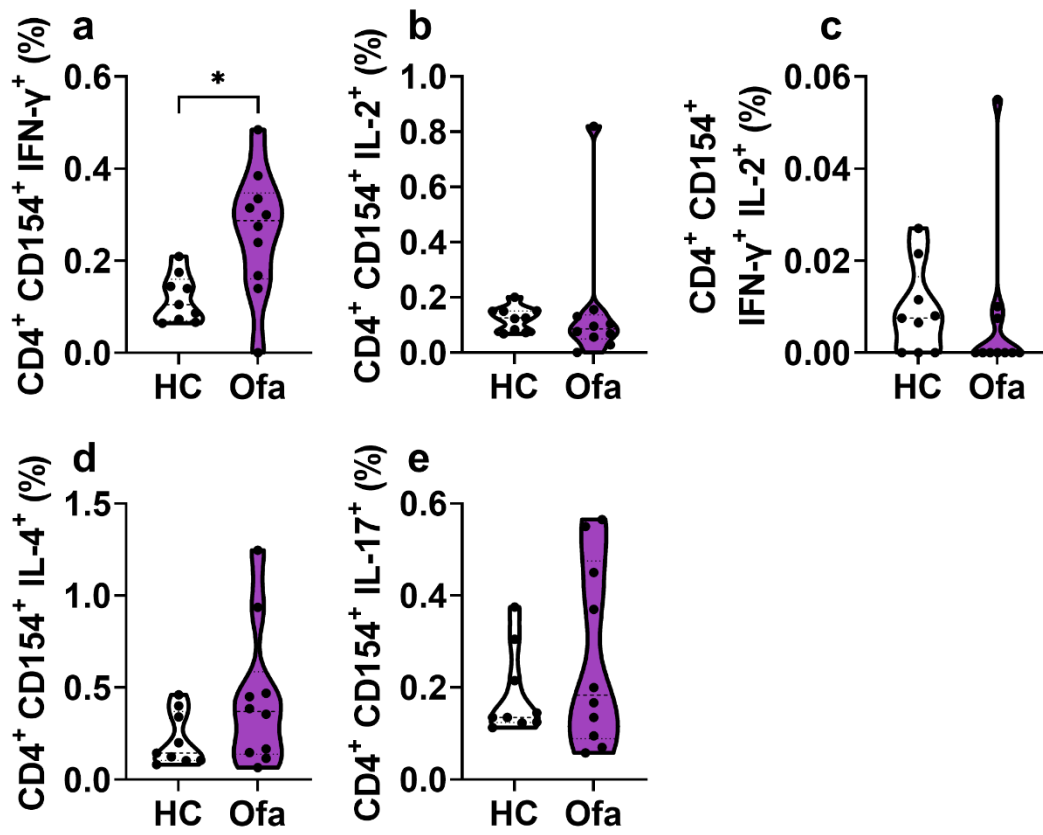

**Supplementary Figure 6: Alternative analysis of activated T helper cells gating with only CD154 serving as activation marker.** Peripheral blood mononuclear cells of Ofatumumab treated MS patients (Ofa) and healthy controls (HC) were collected 4-13 weeks following the third vaccination against SARS-CoV-2 and restimulated with a SARS-CoV-2 peptide pool following immunophenotyping via FACS. (a) Ofatumumab treated MS patients expressed significantly more IFN- $\gamma$  in T helper cells (Th1) ( $p=0.0108$ ). (b, c) Other Th1 expression patterns with IL-2 showed no significant differences between Ofa and HC. (d) T helper-2 cell specific expression patterns were not significantly altered between HC and Ofa ( $p=0.1823$ ). (e) T helper 17 cells did not differ. Data were analyzed with a two-tailed Mann-Whitney test.  $n=10$  Ofa,  $n=9$  HC.  $*p<0.05$ .

## humoral response

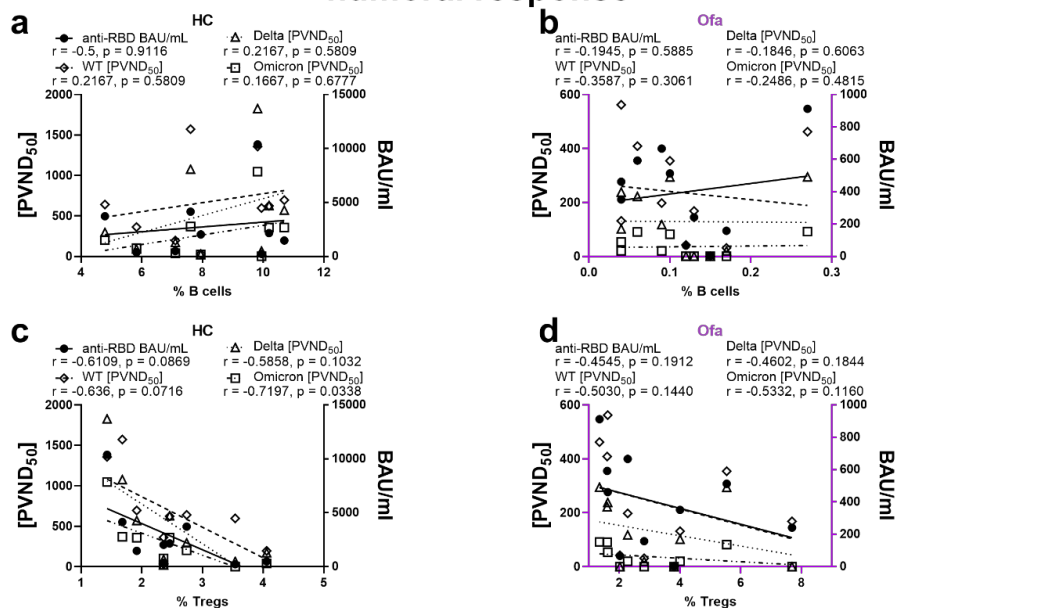

## cellular response

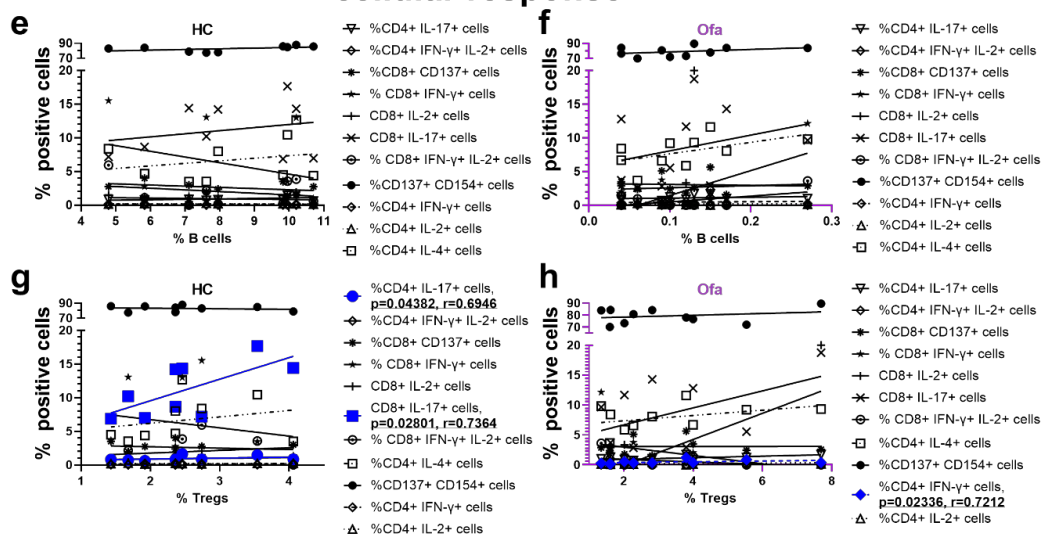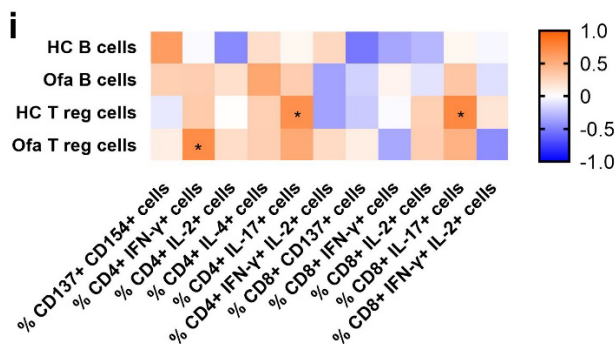

**Supplementary Figure 7: Correlations of B cells and regulatory T cells with parameters of humoral and cellular immune response.** a-d) Correlations of the humoral immune response depending on the frequency of B cells and Tregs prior to stimulation. (a, b) The anti SARS-

CoV-2 spike titer (BAU/mL) and the neutralization capacity of the serum [PVND50] did not correlate with B cell frequencies. (c) In HC, the neutralization capacity against Omicron was dependent on Treg frequencies. The other humoral response parameters were borderline significant for the correlation with %Tregs. (d) In the Ofa group, the humoral response showed a trend to a correlation with Tregs. (e-h) Correlations of the cellular immune response depending on the frequency of B cells and Tregs prior to stimulation. (e,f) Cellular immune response did not depend on the percentage of B cells present prior to stimulation in both HC and Ofa. (g) Frequencies of IL-17 expressing T helper and cytotoxic T cells correlated with the share of Tregs present before the stimulation in HC. (h) In Ofa patients, Th1 cells expressing CD4 and Interferon- $\gamma$  correlated with Tregs. (i) Correlation matrix of B cells and regulatory T cells with cellular immune response, showing r values from panels e-h. Data were analyzed with Spearman correlation. n=10 Ofa, n=9 HC. \*p<0.05.
